# Supplementary material for: Synthesis, stability, and intrinsic photocatalytic properties of vanadium diselenide
Source: Royal Society of Chemistry journal article supplement (doi:10.1039/c6ta10390a), 2016-12-20
Supplement: c6ta10390a1.pdf [file c6ta10390a1.pdf]

## **Supplementary Information**

### **Synthesis, Stability and Intrinsic Photocatalytic Properties of Vanadium Diselenide**

Shijie He<sup>a</sup>, Hua Lin <sup>a\*</sup>, Lizhao Qin<sup>a</sup>, Zhou Mao<sup>a</sup>, Hong He<sup>a</sup>, Yuan Li<sup>a</sup> and Qing Li<sup>a</sup>

<sup>a</sup>*Faculty of Materials and Energy, Southwest University, 400715, P. R. China.*

\*Corresponding authors' e-mails: lh2004@swu.edu.cn

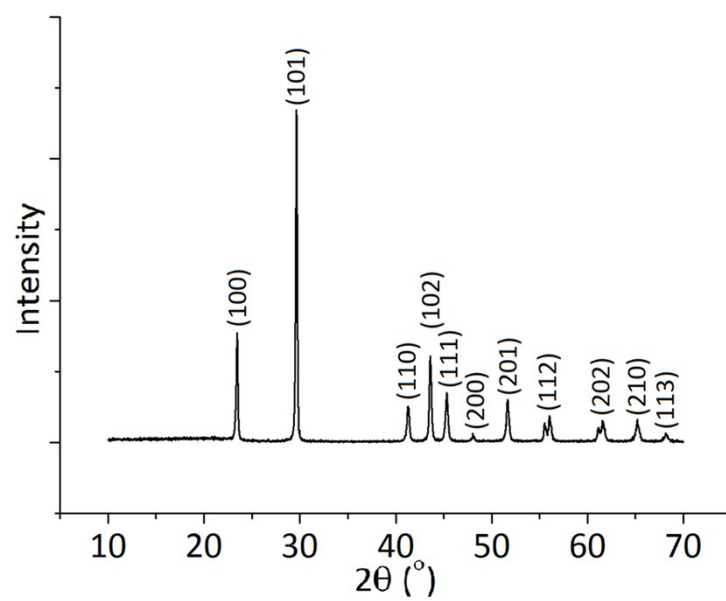

**Fig.S1** XRD pattern of as-synthesized elemental Se (JCPDS No. 86-2246).

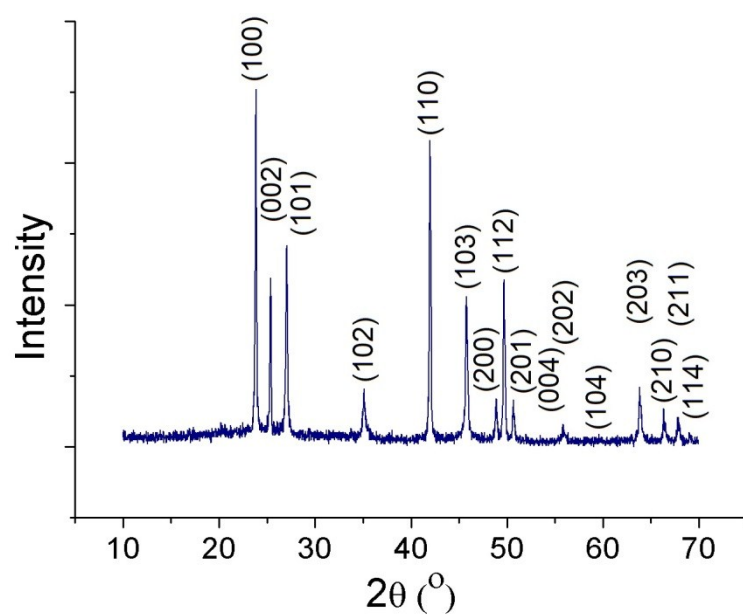

**Fig. S2** XRD pattern of as-synthesized CdSe (JCPDS No. 77-2307) in the same hydrothermal method with the precursor of  $\text{CdCl}_2 \cdot 2.5 \text{H}_2\text{O}$ .

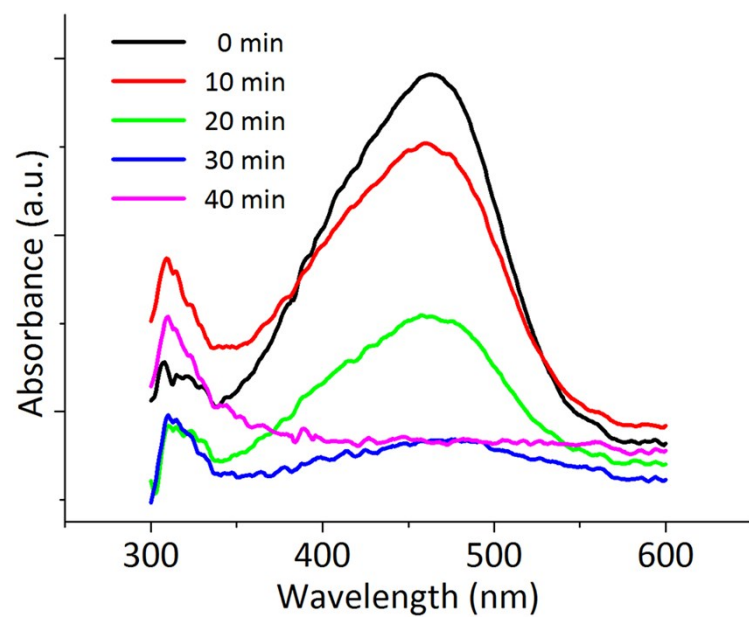

**Fig.S3** Time-dependent absorption spectra of 3 mmol L<sup>-1</sup> VSe<sub>2</sub> and 28mg L<sup>-1</sup> MO in DW.

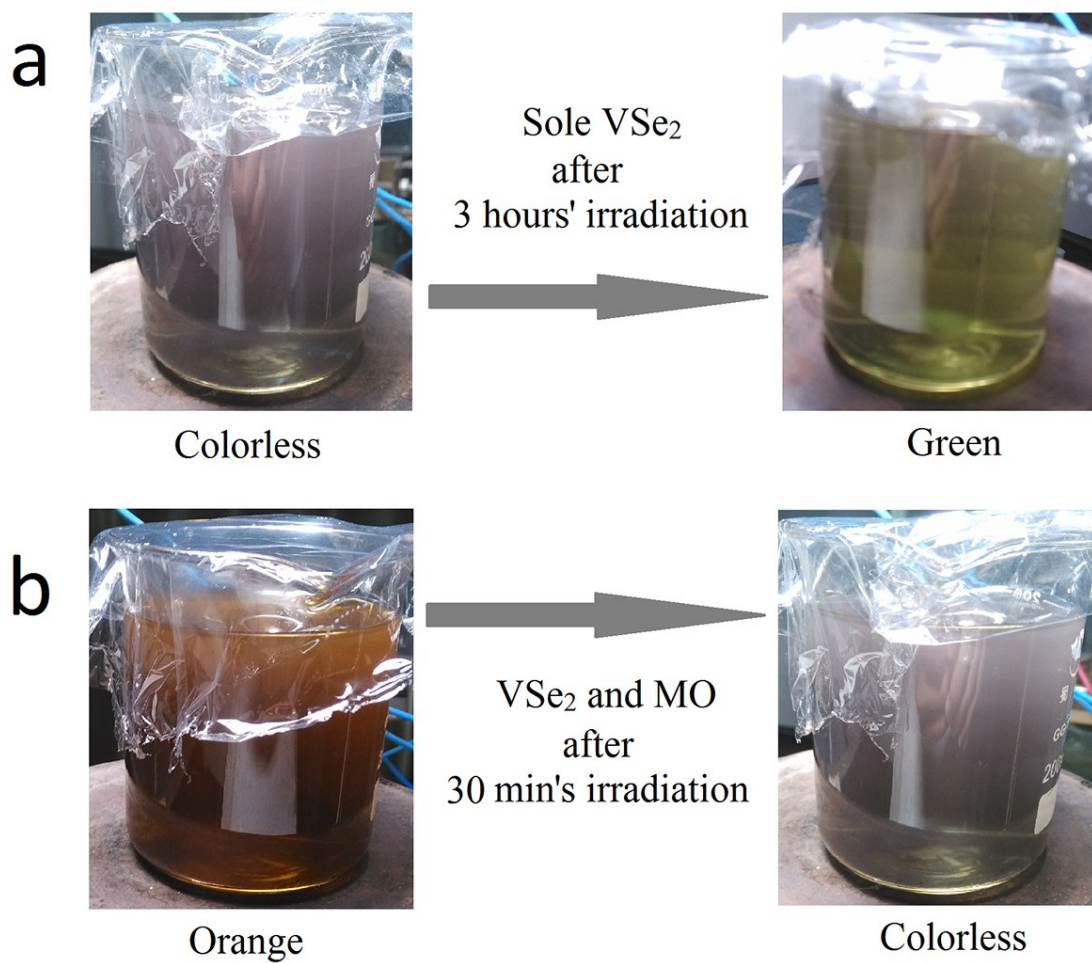

**Fig.S4** Images of  $3 \text{ mmol L}^{-1}$  of (a) sole bulk  $\text{VSe}_2$  and (b) bulk  $\text{VSe}_2$  and  $28 \text{ mg L}^{-1}$  MO in DW, in which the left images are taken right at the beginning of the irradiation in visible-light while the right ones after irradiation.

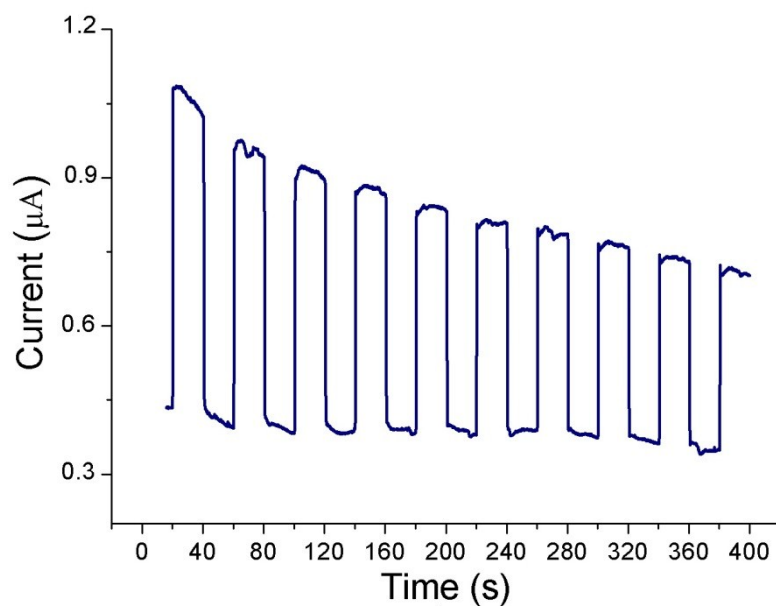

**Fig. S5** Photocurrent curve of VSe<sub>2</sub> gained from a conventional photocurrent test that a drop of as-synthesized VSe<sub>2</sub>/H<sub>2</sub>O (with the weight of VSe<sub>2</sub> of about 0.4 mg) was placed onto a conductive glass, followed by the test with a electrochemical work station (CHI660, Shanghai) operating at an initial voltage of 1.0 V under a lamp with a power of about 800 W, in which the current in the valleys is generated in dark and the one on the plateau is generated in the visible-light.

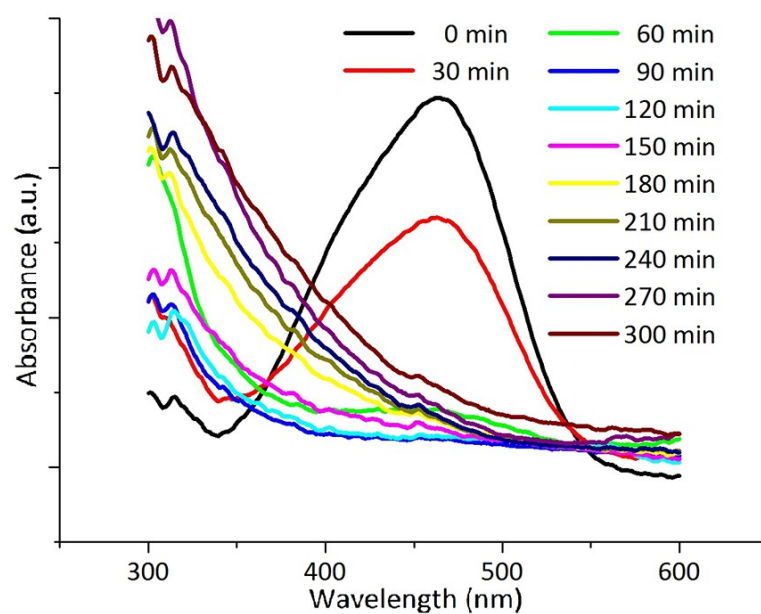

**Fig.S6** Time-dependent absorption spectra of 2 mmol L<sup>-1</sup> VSe<sub>2</sub> and 28 mg L<sup>-1</sup> MO in DW.

**Table S1** Data for the calculations about the percentages of VSe<sub>2</sub> in different samples.

| XRD pattern    |        | Percentage          | 1T-VSe <sub>2</sub> |       | e-Se                |         |
|----------------|--------|---------------------|---------------------|-------|---------------------|---------|
|                |        |                     | I%                  | RIR   | I%                  | RIR     |
| <b>Fig. 4a</b> | Blue   | 1%                  | 1%                  | 7.07  | 95%                 | 7.10    |
|                | Red    | 80%                 | 89%                 | 7.07  | 23%                 | 7.10    |
| <b>Fig. 4b</b> | Blue   | 93%                 | 50%                 | 7.07  | 4%                  | 7.10    |
|                | Red    | 99%                 | 97%                 | 7.07  | 1%                  | 7.10    |
| <b>Fig. 5a</b> | Red    | 100%                | 91%                 | 7.07  | < 1%                | 7.10    |
|                | Brown  | 94%                 | 93%                 | 7.07  | 6%                  | 7.10    |
|                | Blue   | 83%                 | 43%                 | 7.07  | 9%                  | 7.10    |
|                | Orange | 46%                 | 83%                 | 7.07  | 96%                 | 7.10    |
|                | Pink   | 1%                  | 1%                  | 7.07  | 95%                 | 7.10    |
|                | Black  | 0%                  | < 1%                | 7.07  | 89%                 | 7.10    |
| Space Group    |        | 1T-VSe <sub>2</sub> | 164                 | JCPDS | 1T-VSe <sub>2</sub> | 89-1641 |
|                |        | e-Se                | 152                 | No.   | e-Se                | 86-2246 |
